# Supplementary material for: Pathogenetic Mechanisms Underlying Spinocerebellar Ataxia Type 3 Are Altered in Primary Oligodendrocyte Culture
Source: MDPI journal article supplement (doi:10.3390/cells11162615), 2022-08-22

**Supplemental Figure S1. ATXN3 loss-of-function does not impact oligodendrocyte maturation.** Representative images of SMOC1 (green), MBP (red), and DAPI (blue) staining in *Atxn3*-KO oligodendrocytes at DIV0 (A) and DIV5 (B). Scale bar, 100um.

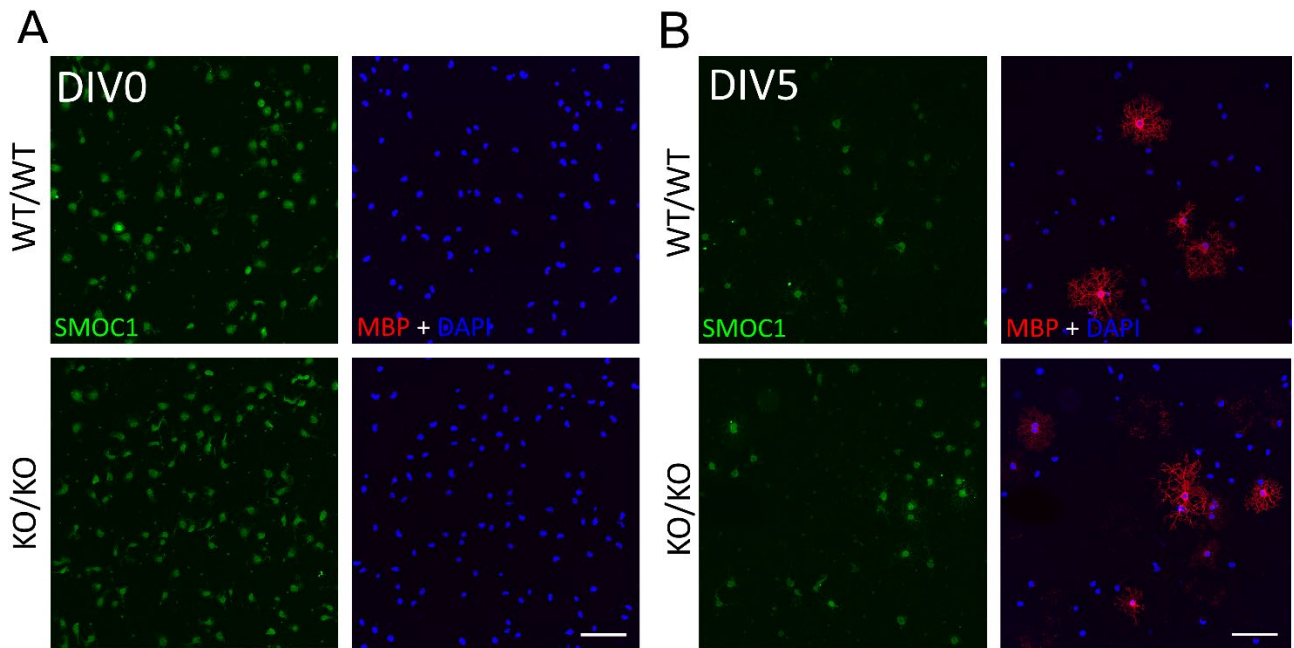

**Supplemental Figure S2. Protein ubiquitination is increased in *Atxn3*-KO OPCs, but not mature oligodendrocytes.** Representative images of Sox10 (cyan) and ubiquitinated (Ub) protein (red) staining in *Atxn3*-KO oligodendrocytes at DIV0 and DIV5. Scale bar: 100 $\mu$ m; inset scale bar: 12.5 $\mu$ m.

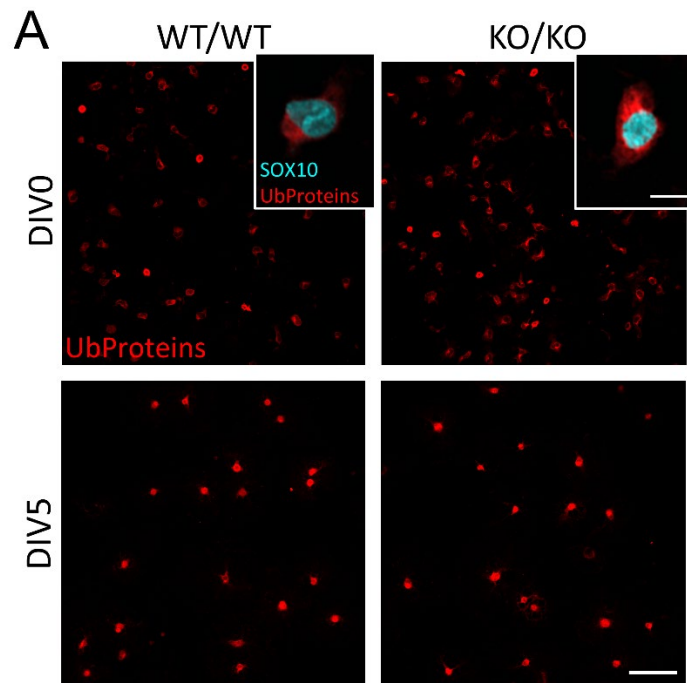

**Supplemental Figure S3. Loss of ATXN3 leads to upregulation of autophagy.** Representative images of p62 (A) and Beclin1 (B) staining in *Atxn3*-KO oligodendrocytes at DIV0 and DIV5. Scale bar: 100 $\mu$ m.

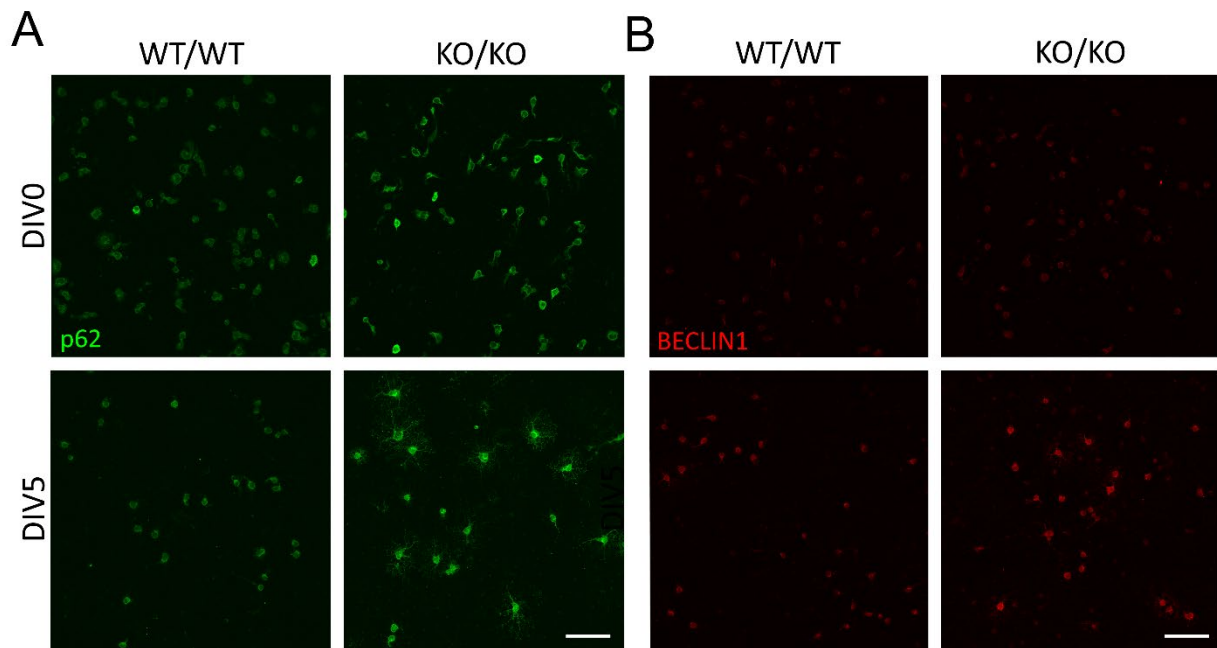

**Supplemental Figure S4. DNA damage is increased in *Atxn3*-KO OPCs and immature oligodendrocytes, but not mature oligodendrocytes.** Representative images of g-H2AX (white), Sox10 (cyan) and MBP (red) staining in *Atxn3*-KO oligodendrocytes at DIV0 (A) and DIV5 (B). Scale bar: 100 $\mu$ m; inset scale bar: 12.5 $\mu$ m.

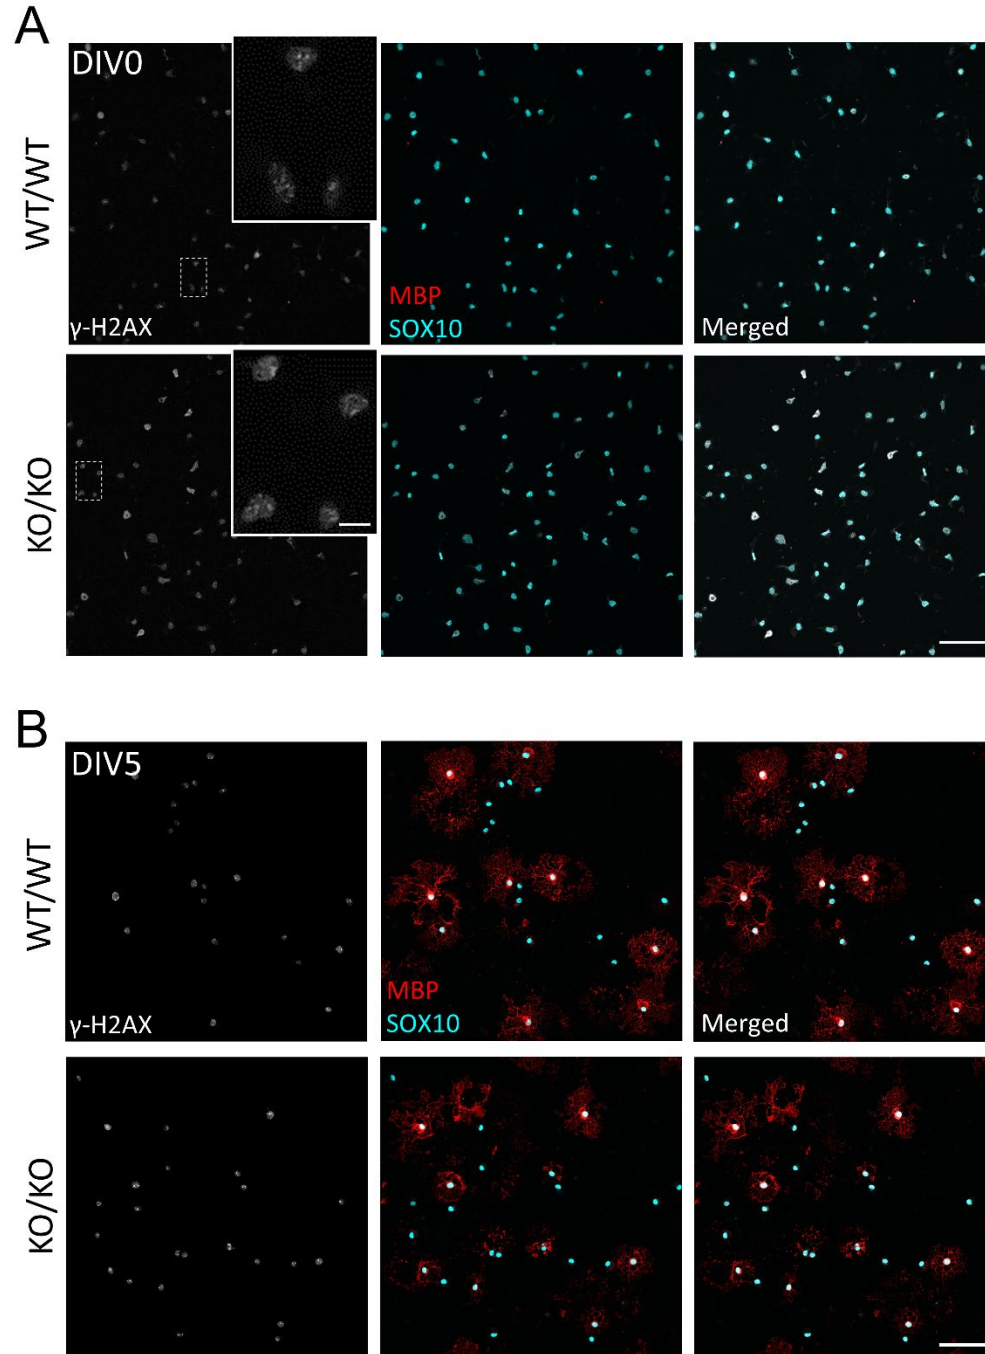

**Supplemental Figure S5. Histone 3 methylation in oligodendrocytes is not affected by loss of ATXN3.** (A-B) Representative images of H3K27me3 (magenta), Sox10 (cyan) and MBP (red) staining in *Atxn3*-KO oligodendrocytes at DIV0 (A) and DIV5 (B). (C-D) Representative images of H3K9me3 (magenta), Sox10 (cyan) and MBP (red) staining in *Atxn3*-KO oligodendrocytes at DIV0 (C) and DIV5 (D). Scale bar: 100μm.

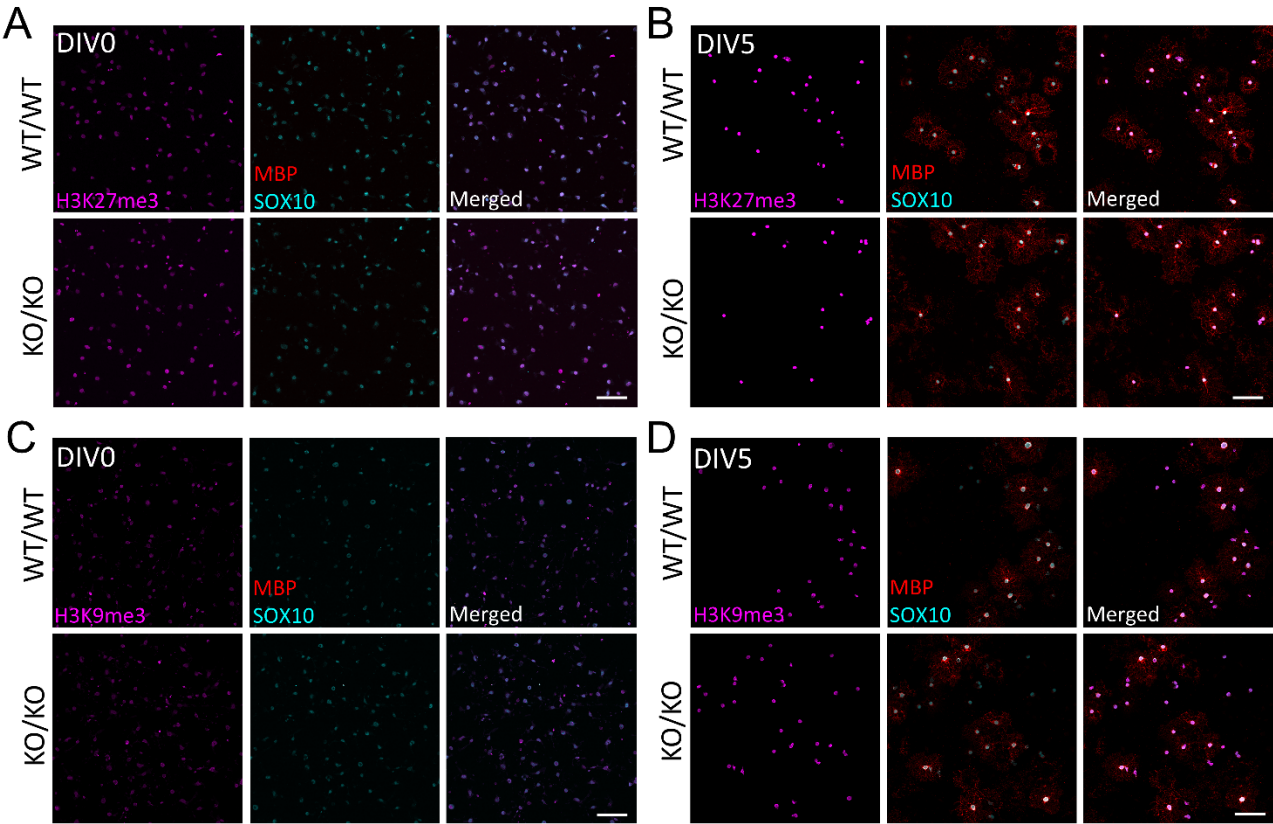

Supplement: s1 [file s1]
